# Supplementary material
Source: Springer Nature journal article supplement (https://www.springermedizin.de/resource/supplementary/12931_2014_1509_MOESM3_ESM.pdf/9426358)

**A**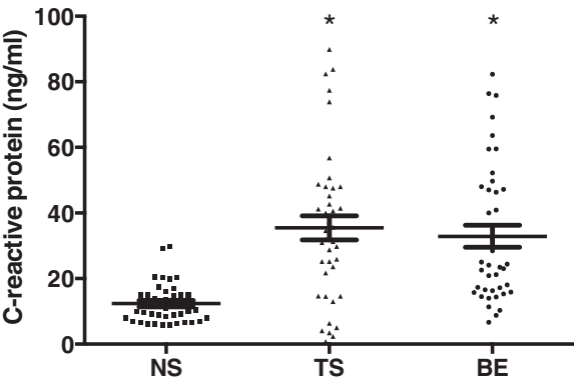**B**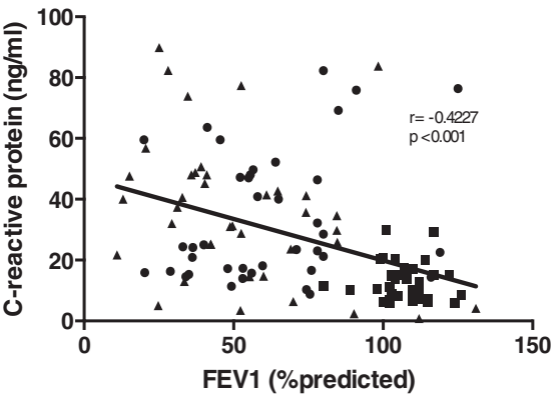

Supplement: MOESM3 [file 9426358]
